# Supplementary material for: Human Neutrophils Produce Antifungal Extracellular Vesicles against Aspergillus fumigatus
Source: PubMed Central journal article supplement (PMC7157820; doi:10.1128/mbio.00596-20), 2020-04-14
Supplement: mBio.00596-20-st001.pdf [file mBio.00596-20-st001.pdf]

**TABLE S1. Proteins identified with predicted transmembrane domains.**

| <b>Accession</b> | <b>Protein</b>                                                               | <b>TMT dataset</b> | <b>LFQ dataset</b> |
|------------------|------------------------------------------------------------------------------|--------------------|--------------------|
| P25024           | C-X-C chemokine receptor type 1 (CXC-R1)                                     | +                  | -                  |
| P25025           | C-X-C chemokine receptor type 2 (CXC-R2)                                     | +                  | -                  |
| Q9HDC9           | Adipocyte plasma membrane-associated protein                                 | +                  | +                  |
| P19397           | Leukocyte surface antigen CD53                                               | +                  | -                  |
| Q13724           | Mannosyl-oligosaccharide glucosidase                                         | +                  | -                  |
| J3KNB4           | Cathelicidin antimicrobial peptide                                           | +                  | -                  |
| P15144           | Aminopeptidase N                                                             | +                  | +                  |
| Q14697           | Neutral alpha-glucosidase AB                                                 | +                  | +                  |
| P08246           | Neutrophil elastase                                                          | +                  | +                  |
| M9MML0           | Fc of IgG low affinity IIIa receptor isoform 1                               | +                  | -                  |
| Q8TDB8           | Solute carrier family 2, facilitated Glc transporter member 14               | +                  | +                  |
| P27105           | Erythrocyte band 7 integral membrane protein                                 | +                  | +                  |
| P13498           | Cytochrome b-245 light chain                                                 | +                  | +                  |
| P08962           | CD63 antigen (Granulophysin)                                                 | +                  | -                  |
| P04839           | Cytochrome b-245 heavy chain                                                 | +                  | -                  |
| P17213           | Bactericidal permeability-increasing protein (BPI)                           | +                  | -                  |
| J3KPA1           | Cysteine-rich secretory protein 3 CRISP3                                     | +                  | +                  |
| Q53GQ0           | Very-long-chain 3-oxoacyl-CoA reductase                                      | -                  | +                  |
| Q96N66           | Lysophospholipid acyltransferase 7 (LPLAT 7)                                 | -                  | +                  |
| Q9NV96           | Cell cycle control protein 50A                                               | -                  | +                  |
| P08473           | Neprilysin                                                                   | -                  | +                  |
| O43760           | Synaptogyrin-2                                                               | -                  | +                  |
| P07686           | Beta-hexosaminidase subunit beta                                             | -                  | +                  |
| P20701           | Integrin alpha-L (CD11 antigen-like family member A)                         | -                  | +                  |
| F5H2F4           | C-1-tetrahydrofolate synthase                                                | -                  | +                  |
| P39656           | Dolichyl-diphosphooligosaccharide-protein glycosyltransferase 48 kDa subunit | -                  | +                  |
| P00403           | Cytochrome c oxidase subunit 2                                               | -                  | +                  |
| P33121           | Long-chain-fatty-acid--CoA ligase 1                                          | -                  | +                  |
| Q15722           | Leukotriene B4 receptor 1 (LTB4-R 1)                                         | -                  | +                  |
| I3L0A0           | HCG2044781                                                                   | -                  | +                  |
| Q9NYU2           | UDP-glucose:glycoprotein glucosyltransferase 1                               | -                  | +                  |
| Q8IWA5           | Choline transporter-like protein 2                                           | -                  | +                  |
| P13473           | Lysosome-associated membrane glycoprotein 2 (LAMP-2)                         | -                  | +                  |
| Q7L5N7           | Lysophosphatidylcholine acyltransferase 2                                    | -                  | +                  |
| O75477           | Erlin-1 (Endoplasmic reticulum lipid raft-associated protein 1)              | -                  | +                  |
| P21730           | C5a anaphylatoxin chemotactic receptor 1                                     | -                  | +                  |
| E7ER45           | Maltase-glucoamylase                                                         | -                  | +                  |
| P57088           | Transmembrane protein 33                                                     | -                  | +                  |
