# Supplementary material for: Human Neutrophils Produce Antifungal Extracellular Vesicles against Aspergillus fumigatus
Source: PubMed Central journal article supplement (PMC7157820; doi:10.1128/mbio.00596-20), 2020-04-14
Supplement: mBio.00596-20-st002.pdf [file mBio.00596-20-st002.pdf]

**TABLE S2. List of primers used in this study.**

| <b>Name</b>        | <b>Sequence (5'-3')</b>                             |
|--------------------|-----------------------------------------------------|
| Azu_polictail_f    | TCACCTCCATCTCAACTCCATCACATCACAATGATCGTCGGCGGCCGCAA  |
| cathG_polictail_f  | TCACCTCCATCTCAACTCCATCACATCACAATGATCATCGGGCGGCCGCGA |
| RBP7_polictail_F   | TCACCTCCATCTCAACTCCATCACATCACAATGCCCGCAGATCTATCTGG  |
| tef_r              | ATTAAGGGTTCTCGAGAGCT                                |
| pYES2_r            | AATATCCCTATAGTGAGTC                                 |
| pYES2_f            | CTAGAGGGCCGCATCATGTA                                |
| ptetOn_pYES2tail_f | GCTGTAATACGACTCACTATAGGGAATATTTCTTTGCCCGGTGTATGAAA  |
| pOliC_r            | CTCAACTCCATCACATCACA                                |
| ptrA_teftail_f     | GTCGAAAACGAGCTCTCGAGAACCCTTAATCAATTGATTACGGGATCCCA  |
| ptrA_pYES2tail_r   | CATAACTAATTACATGATGCGGCCCTCTAGTCTTTCTTGTTACACATAAT  |
